# Supplementary material for: Targeted Deletion and Inversion of Tandemly Arrayed Genes in Arabidopsis thaliana Using Zinc Finger Nucleases
Source: Oxford University Press journal article supplement (doi:10.1534/g3.113.006270), 2013-08-27
Supplement: 006270_006270si.pdf [file 006270_006270si.pdf]

## Targeted deletion and inversion of tandemly arrayed genes in *Arabidopsis thaliana* using zinc finger nucleases

Yiping Qi,<sup>\*</sup> Xiaohong Li,<sup>\*</sup> Yong Zhang,<sup>\*,§</sup> Colby G Starker,<sup>\*</sup> Nicholas J Baltes,<sup>\*</sup> Feng Zhang,<sup>\*,1</sup> Jeffry D Sander,<sup>\*\*,§§</sup> Deepak Reyon,<sup>\*\*,§§,\*\*\*</sup> J Keith Joung,<sup>\*\*,§§</sup> and Daniel F Voytas<sup>\*,2</sup>

<sup>\*</sup>Department of Genetics, Cell Biology & Development and Center for Genome Engineering, University of Minnesota, Minneapolis, Minnesota 55455, USA; <sup>§</sup>Department of Biotechnology, School of Life Sciences and Technology, University of Electronic Science and Technology of China, Chengdu 610054, China; <sup>\*\*</sup>Molecular Pathology Unit, Center for Computational and Integrative Biology, and Center for Cancer Research, Massachusetts General Hospital, Charlestown, Massachusetts 02129, USA; <sup>§§</sup>Department of Pathology, Harvard Medical School, Boston, Massachusetts 02115, USA; <sup>\*\*\*</sup>Department of Genetics, Development and Cell Biology, Interdepartmental Graduate Program in Bioinformatics & Computational Biology, Iowa State University, Ames, Iowa 50011, USA.

<sup>1</sup>Current address: Cellectis Plant Sciences, 1000 Westgate Drive, Suite 136, St. Paul, MN 55114, USA.

<sup>2</sup>Corresponding author.

**DOI: 10.1534/g3.113.006270**

> At1g53-ZF\_Left  
GAAAAAAA**TCTAGA**CCCGGGGAGCGCCCTTCCAGTGTGCGATTTGCATGCGGAACTTTTCGAAACATTCTAACTTGACCCGTCATACCC  
GTACTCATACCGGTGAAAAACCGTTTCAGTGTGCGATCTGTATGCGAAATTTCTCCCAGCGTTCTGACTTGACCCGTCATCTACGTACGC  
ACACCGGCGAGAAGCCATTCCAATGCCGAATATGCATGCGCAACTTCAGTCGTCCAGACGCATTGCCACGTACCTAAAAACCCACCTG  
AGGG**GATCCA**AAGAAGGA

> At1g53-ZF\_right  
GAAAAAAA**TCTAGA**CCCGGGGAGCGCCCTTCCAGTGTGCGATTTGCATGCGGAACTTTTCGAGCAGTCTTCTTTGTTGCGTCATACCC  
GTACTCATACCGGTGAAAAACCGTTTCAGTGTGCGATCTGTATGCGAAATTTCTCCCAGCGTTCTGACTTGACCCGTCATCTACGTACGC  
ACACCGGCGAGAAGCCATTCCAATGCCGAATATGCATGCGCAACTTCAGTCAGCGTGGTAAC TTGAACATGCACCTAAAAACCCACCTG  
AGGG**GATCCA**AAGAAGGA

> At1g70-ZF\_left  
GAAAAAAA**TCTAGA**CCCGGGGAGCGCCCTTCCAGTGTGCGATTTGCATGCGGAACTTTTCGATGAAAAACACCTTGACCCGTCATACC  
CGTACTCATACCGGTGAAAAACCGTTTCAGTGTGCGATCTGTATGCGAAATTTCTCCCAGCGTTCTGACTTGACCCGTCATCTACGTACGC  
CACACCGGCGAGAAGCCATTCCAATGCCGAATATGCATGCGCAACTTCAGTCAGCGTGGTAAC TTGAACATGCACCTAAAAACCCACCT  
GAGG**GATCCA**AAGAAGGA

> At1g70-ZF\_right  
GAAAAAAA**TCTAGA**CCCGGGGAGCGCCCTTCCAGTGTGCGATTTGCATGCGGAACTTTTCGAGCCATCTAACTTGATTGTCATACCC  
GTACTCATACCGGTGAAAAACCGTTTCAGTGTGCGATCTGTATGCGAAATTTCTCCCAGTACCGACACCTTGGCAGTCATCTACGTACGC  
ACACCGGCGAGAAGCCATTCCAATGCCGAATATGCATGCGCAACTTCAGTCAGGGTGGTGCATTGCAGCGTCACCTAAAAACCCACCTG  
AGGG**GATCCA**AAGAAGGA

> At4g16-ZF\_left  
GAAAAAAA**TCTAGA**CCCGGGGAGCGCCCTTCCAGTGTGCGATTTGCATGCGGAACTTTTCGAGGCATCTAACTTGACCCGTCATACC  
CGTACTCATACCGGTGAAAAACCGTTTCAGTGTGCGATCTGTATGCGAAATTTCTCCCAGCAGACCAACTTGACCCGTCATCTACGTACGC  
CACACCGGCGAGAAGCCATTCCAATGCCGAATATGCATGCGCAACTTCAGTCAGACCAACAAC TTGAACCGTCACCTAAAAACCCACCT  
GAGG**GATCCA**AAGAAGGA

> At4g16-ZF\_right  
GAAAAAAA**TCTAGA**CCCGGGGAGCGCCCTTCCAGTGTGCGATTTGCATGCGGAACTTTTCGAGCAACGCACATTTGGCAGTCATACC  
CGTACTCATACCGGTGAAAAACCGTTTCAGTGTGCGATCTGTATGCGAAATTTCTCCGACTCTTCTGTTTTGCGTCGTCATCTACGTACGC  
ACACCGGCGAGAAGCCATTCCAATGCCGAATATGCATGCGCAACTTCAGTCAGTCTACCTTTTGCAGCGTCACCTAAAAACCCACCTGA  
GGG**GATCCA**AAGAAGGA

> At3g21-ZF\_left  
GAAAAAAA**TCTAGA**CCCGGGGAGCGCCCTTCCAGTGTGCGATTTGCATGCGGAACTTTTCGAAACGTCAGCATTTGGAATATCATACCC  
GTACTCATACCGGTGAAAAACCGTTTCAGTGTGCGATCTGTATGCGAAATTTCTCCCAGCGTTCTGACTTGACCCGTCATCTACGTACGC  
ACACCGGCGAGAAGCCATTCCAATGCCGAATATGCATGCGCAACTTCAGTCATGGTCATCGTTTGAACCCACCTAAAAACCCACCTGA  
GGG**GATCCA**AAGAAGGA

> At3g21-ZF\_right  
GAAAAAAA**TCTAGA**CCCGGGGAGCGCCCTTCCAGTGTGCGATTTGCATGCGGAACTTTTCGTTGCGTACCTCTTTGGTTGTCATACCC  
GTACTCATACCGGTGAAAAACCGTTTCAGTGTGCGATCTGTATGCGAAATTTCTCCGACTCTTCTGTTTTGCGTCGTCATCTACGTACGCA  
CACCGGCGAGAAGCCATTCCAATGCCGAATATGCATGCGCAACTTCAGTTTGTCTACCAACTTGACCCGTCACCTAAAAACCCACCTGAG  
GGG**GATCCA**AAGAAGGA

> At5g01-ZF\_left  
GAAAAAAA**TCTAGA**CCCGGGGAGCGCCCTTCCAGTGTGCGATTTGCATGCGGAACTTTTCGCGTCCATCTAAATTGGTTTTGCATACCC  
GTACTCATACCGGTGAAAAACCGTTTCAGTGTGCGATCTGTATGCGAAATTTCTCCTTGAAAGAACATTTGACCCGTCATCTACGTACGCA  
CACCGGCGAGAAGCCATTCCAATGCCGAATATGCATGCGCAACTTCAGTCAGTCTCAGCATTTGGTTGTCACCTAAAAACCCACCTGAG  
GGG**GATCCA**AAGAAGGA

> At5g01-ZF\_right  
GAAAAAAA**TCTAGA**CCCGGGGAGCGCCCTTCCAGTGTGCGATTTGCATGCGGAACTTTTCGAGGCATCTAACTTGACCCGTCATACC  
CGTACTCATACCGGTGAAAAACCGTTTCAGTGTGCGATCTGTATGCGAAATTTCTCCCAGCAGACCAACTTGACCCGTCATCTACGTACGC  
CACACCGGCGAGAAGCCATTCCAATGCCGAATATGCATGCGCAACTTCAGTAAAAACGTTTCTTTGACCCATCACCTAAAAACCCACCTG  
AGGG**GATCCA**AAGAAGGA

**Figure S1** DNA sequences for zinc finger arrays. DNA sequences for ten zinc finger arrays of five pairs of ZFNs are shown. The restriction enzyme sites (XbaI and BamHI) for subcloning of the zinc finger arrays into expression vectors are marked in red and blue, respectively.

**A**

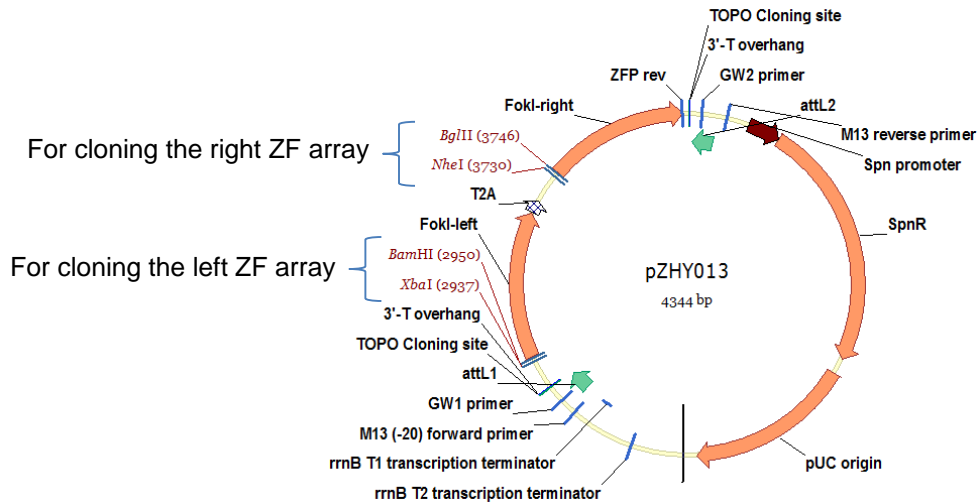

**B**

>pZHY013

```

aaggcgaaattcgaccgacttctgtacaaagtggcattataaaaaataattgctcatcaatttggccaacgaacaggtcactatcagtaaaaaaatttggccaatccagctgatcccttatagtgctgattacatggtc
atagctgttccctggcagctctggcccggtctcaaaatctctgatgttaccattgcacaagataaaaaatatacatcatgcccctctggaccagccaggaagaaatgctcagctctgctgcccagggtgccgggtgacgcaccg
tggaaacggatgaaggcagaaaccagtgacataaagcctgttggctgtaagctgtaagcgaatgacgtatgctcagcaacaggtggtccagaaacctgaccgaacgagcgggtgtaacggcgcagtgccgttttcagctgt
ttatgactgtttttgggtacagctctatgctcggccatcaagcagcaagcgggttacgcgggtggtgattgattgattgagcagcaacagtgtaacgagcagggcagctgcctcaaaaaagtaaacatcatgagggaaag
cgggtgatccggaagtatcgactcaactacagaggtggtggcgtcatcgagcgcacatcgaaaccgagcgttctggccgtacattgtgacgctccgagtggtgagcggcctgaagccaacacagtgatattgattgctggttacgggtg
accgtaaggctgatgaacaacgcgcgactttgatcaacgacttttggaaactcggctcccctggagagagcgagattctccgcgctgtagaagtcaccattgttgccagcagacatcattccgtgctgtaccagtaaacg
cgaaactgcaattggagaatggcagcgaatgacattctgcaaggtattctgagcagccacgacgacattgatctgctgaacaaagcaagagaacatagcgttgcctggttagtccacggcgaggaactcttctgat
ccggttctgaaacagatctattgagcgctaaatgaaacctaaacgctatgaaactcggccgactggtgagcagaaatgtagtgccttccgctattggtacagcgcagtaaacggcgaacaaatcgccgca
ggatgctcgtccgactgggcaaatgagcgcctcggcccaatgacgcccctatactgaagctagacaggtcattctggacaagaagaagatcgctggcctcgccgcagatcagttggaaatgttgcactacgctgaaag
cggagatcaccaggtagtggcaataaacctcgagcccccagaccaaaatcccttaacgtgagttacgcgtgttccactgagctcagaccccgtaaaaaagatcaaggatctctctga gatcctttttctgcgctaatctgct
gcttgcacaaaaaacaccgctaccagcgggtgttgggttggcggatcaagagclacaaactcttttccgaaagtaactggtctcagcagagcgcagatacacaatactgctcctctagtgtagccgtaaccactcaag
aacctgtgaccaccctacataaccctgctctgtaactctgtaccagtggtcgtcgcagtgccgataaactcgtgcttaccgggttgactcaagacgatagttaccggataggcgcagcgtgctcggctgaacggggggtctgca
cacagcccagcttgagcgaacgacctaaccgaactgagatacctacagcgtgacattgagaaaagcgccactcccgaagggaagaaaggcggacaggtatccgtaacggcgaggtcggaacaggagagcgcagca
gggagctccaggggaaacgcctggtatctttagtctgctgggttcccaactctgactgagcgtgattttgtgactgctcagggggggcgagcctatggaaaaacgccacacgcggccttttaccggttctggtcctttgct
gcgctttgctcacaatgcttctcgtggttaccctgattctgtgataaccgcttaccgctttagtgagctgactaccgctcggcagccgacagcggagcgcagcagtgatcagtgagcagggaaagcgaagagcggccaatcgt
caaacccgctctcccgcgctggccgattcaatgacgtgacgacagcaggtttcccgactgaaagcggcgagtgagcgaacaaatatacgcgtaccgctccaggaagaggttgtagaaaacgcaaaaggccatc
ctgcagatggcctctcttagttgctgctggcagttattggcggcgctctcggccaccctcggccgctgctcacaacgttcaaatccgctccggcgatttctactacagga gagcgttaccgcaacaaacacagataaaa
acgaaaggccagcttccgactgagccttctgtttattgctgctgctcctactctcgtgtaaacgctgcatgagttlctccagtcacgactgttaaaacagcggccagctt aagctcgggcccacaataatgattttatgac
tgatgtagcctgtctgcaacaaatgtagcgaatgcttttataatgccaactgtgataaaaaagcaggtcctgaattcgcctcaccatggattataaggatcagatggcgacta caaggccaagatgactacaagaag
gatgacgataaaatgctcctaagaaaaagcgaagctggtatccatggttcccttagataaacgcagagatccagctggtgaaagcgaagaaagagagagaggtgggcattcaccggggtccggctagc tagiaagcttagatcacaact
gagtaacatcgagctgagatgcccgaacacgccaagaccgacatcctggagatgaaagtgatggagttcttcaatgaaagtgtagcctacggcgaagcactggcggtccggcgaagcccggatggcctatcaca
ccgtggcctccccctcagactatggctcattgtcgaacaaagcctaccggcgtcacaactaccactcgtcagggcgcagagatcaacgctacgtgaaggagaaccagaccgcaat aagccaactaatacccaagag
tgggaaaggtgaccctctcgtgaccgagttcaaatcctgtctgctcggccactcaaggcaattataaggccaactgaccgctgaaaccacaagaccaactgcaacggcggcctgctgctcgtggaggaactcgtgctgac
ggcggcgagatgataaggctggtaccctgacctggaagaggtgctggcgaagtcaacaatggtgaaatcaatlcaggtcggcgggagagggcagaggaagtcitcaacatgctggtgacgtggaggagaatccccggc
ctaggatggactacaagaccatgacggtgattataaagatcatgacatcgattacaaggatgacagatgcccaccaagaagagagagaggtggcattcaccggggtccggctagc tagiaagcttagatcacaact
agtcacaaagtgaactggagagagaagaaatgtaactcgtcataaattgaaatattgctcctgataatattgaaatgaaatggccagaaatccactcaggtatgaaatcgtgaaatga agttaaagtaatttttgaagattttag
gataatagaaggtaaacattgggtggtcaaggaacccggacgggcaattatactgctggactcctattgatacctgtgctgtagctggtgatacctaagcttataatcctgcca attgccaagcagatgaaatggagcgc
atatgtcgaagaaatcaaacgaaacaaacatcacaacctaatgaaatggtgaaagctctaccattctgtaacggaatttaattttattgtaggtgctactttaaaggaaactaca aagctcagcttaccaggttaaatcatatc
actaatgttaaggagctgttctagtgtagaagactttaaattgggtggagaatgattaaagccggccacttaaccctagaggaagtgagacggaattataaccggcgagataaaccttta atag

```

**Figure S2** ZFN expression entry clone-pZHY013. (A) Map of the pZHY013 entry clone. The restriction enzyme sites for cloning zinc finger arrays are marked. (B) Full sequence of the pZHY013 entry clone.

**A**

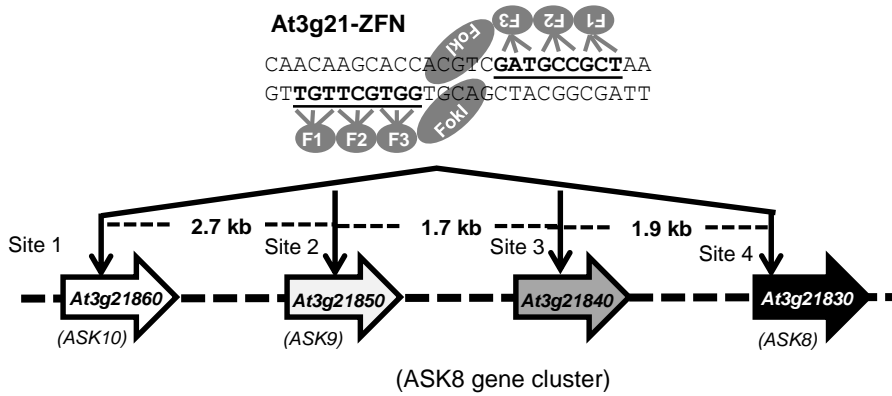

**B**

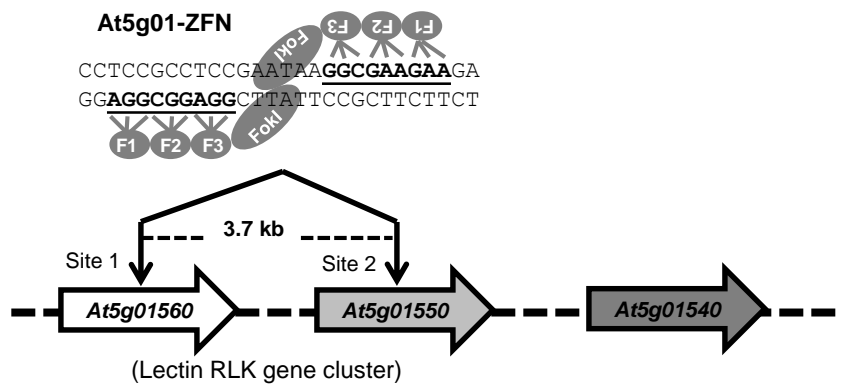

**Figure S3** ZFNs that target the *ASK8* gene cluster and a lectin *RLK* gene cluster. (A) The At3g21-ZFN targets all four members of the *ASK8* gene cluster. (B) The At5g01-ZFN targets two genes in a lectin *RLK* gene cluster. Cartoons illustrate the ZFN pairs, and the DNA recognition triplets are indicated. The zinc finger binding sequences are underlined and the distance between cleavage sites is shown.

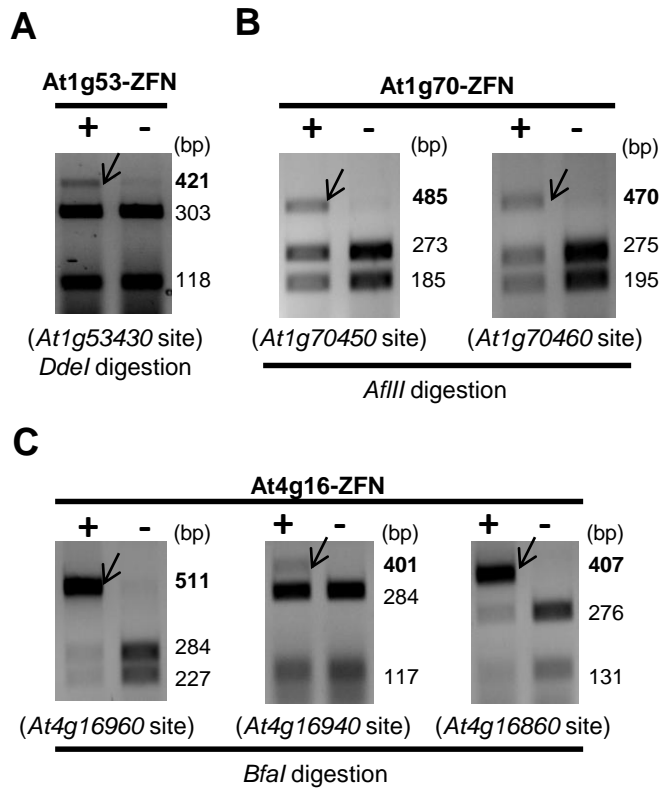

**Figure S4** CoDA-assembled ZFNs are active in T1 plants. (A) *At1g53-ZFN*'s activity is detected at *At1g53430*. (B) *At1g70-ZFN*'s activity is detected at both *At1g70450* and *At1g70460*. (C) *At4g16-ZFN*'s activity is detected at *At4g16960*, *At4g16940* and *At4g16860*. Activity of ZFNs was measured by enrichment PCR using the restriction enzymes shown in each panel. The uncut bands represent ZFN-induced mutations and are indicated by arrows. Bulked estradiol-treated T1 transgenic plants or wild type plants were compared.

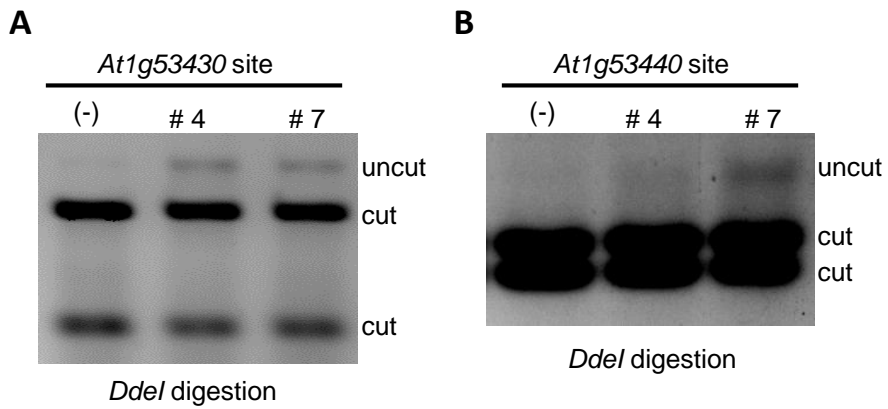

**Figure S5** *At1g53*-ZFN activity at two targets revealed by enrichment PCR in T2 plants. (A) Enrichment PCR detection of ZFN activity at the *At1g53430* locus in two T2 transgenic populations. (B) Enrichment PCR detection of ZFN activity at the *At1g53440* locus in two T2 transgenic plant populations.

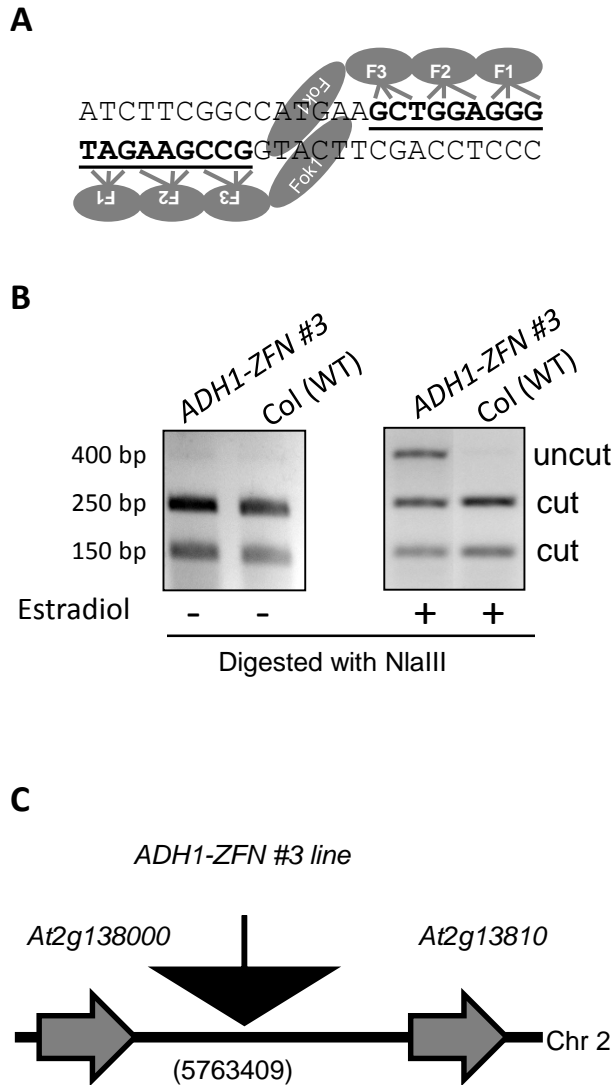

**Figure S6** An active ADH1-ZFN #3 line. (A) Schematic of the ADH1-ZFN and its target site. (B) ADH1-ZFN activity is highly estradiol-inducible. Mutagenesis activity, as reflected by the uncut band, was detected by PCR and digestion (C) Precise location of the transgene in ADH1-ZFN #3 line as mapped by TAIL-PCR.

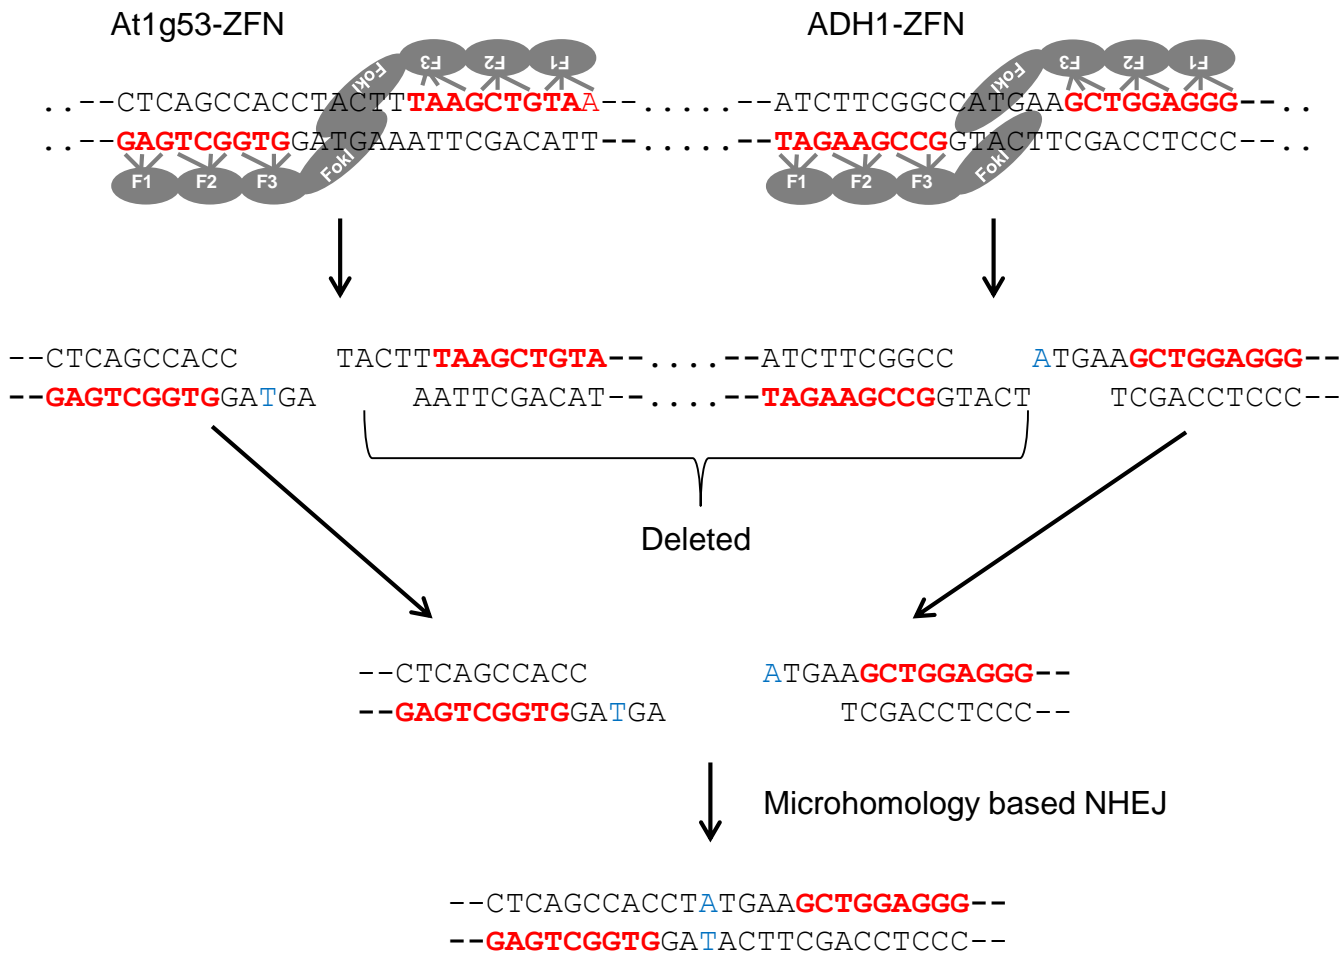

**Figure S7** A possible NHEJ repair mechanism using 1-bp of microhomology. The process that leads to a common ligation product is depicted. The ZFN binding sites are shown in red and the 1 nt of likely microhomology is marked in blue.



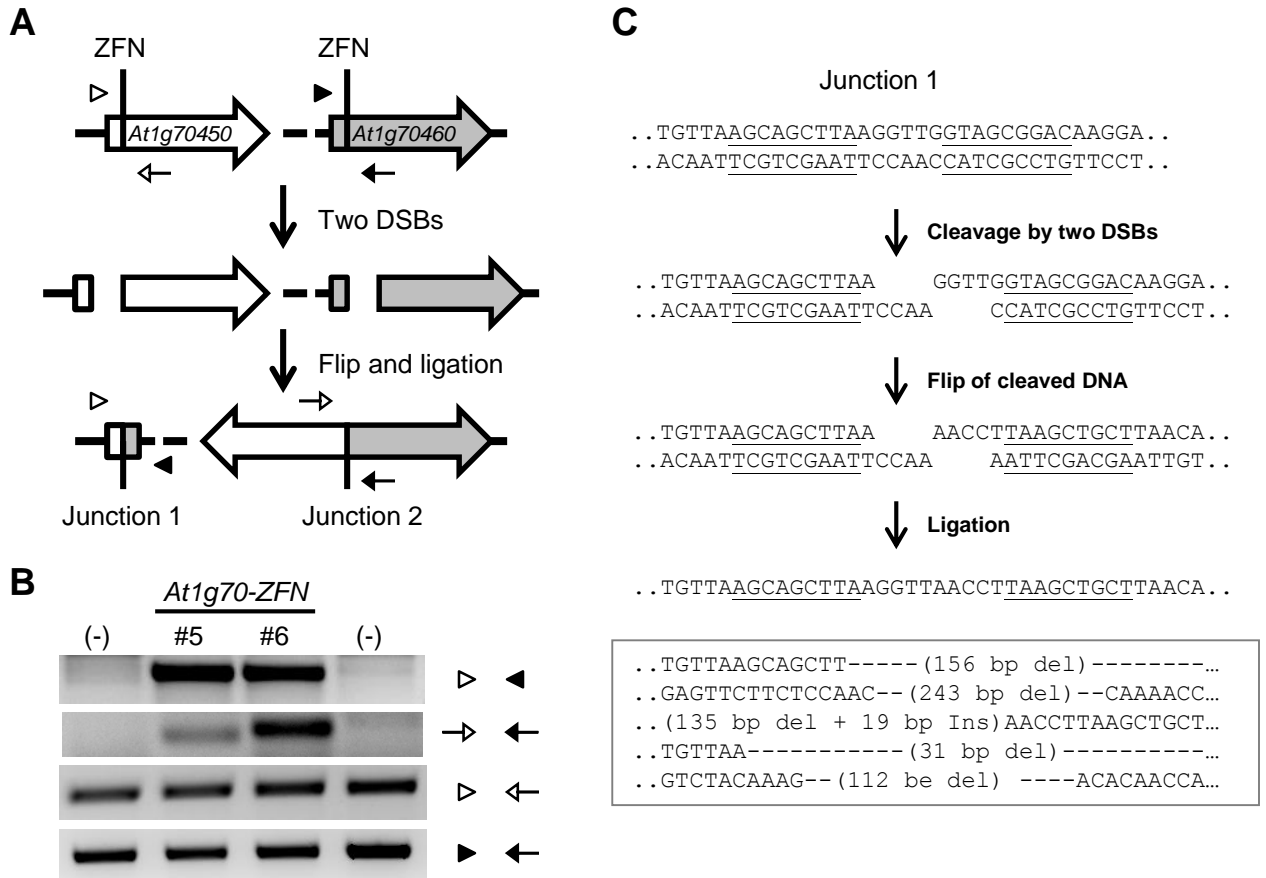

**Figure S8** Inversion of the *At1g70450* gene cluster. (A) Schematic of the *At1g70450* gene cluster inversion. Positions of PCR primers for confirming inversions are indicated by empty or filled triangles and arrows. (B) PCR confirmation of gene cluster inversions. (C) DNA sequence confirmation of inversions.

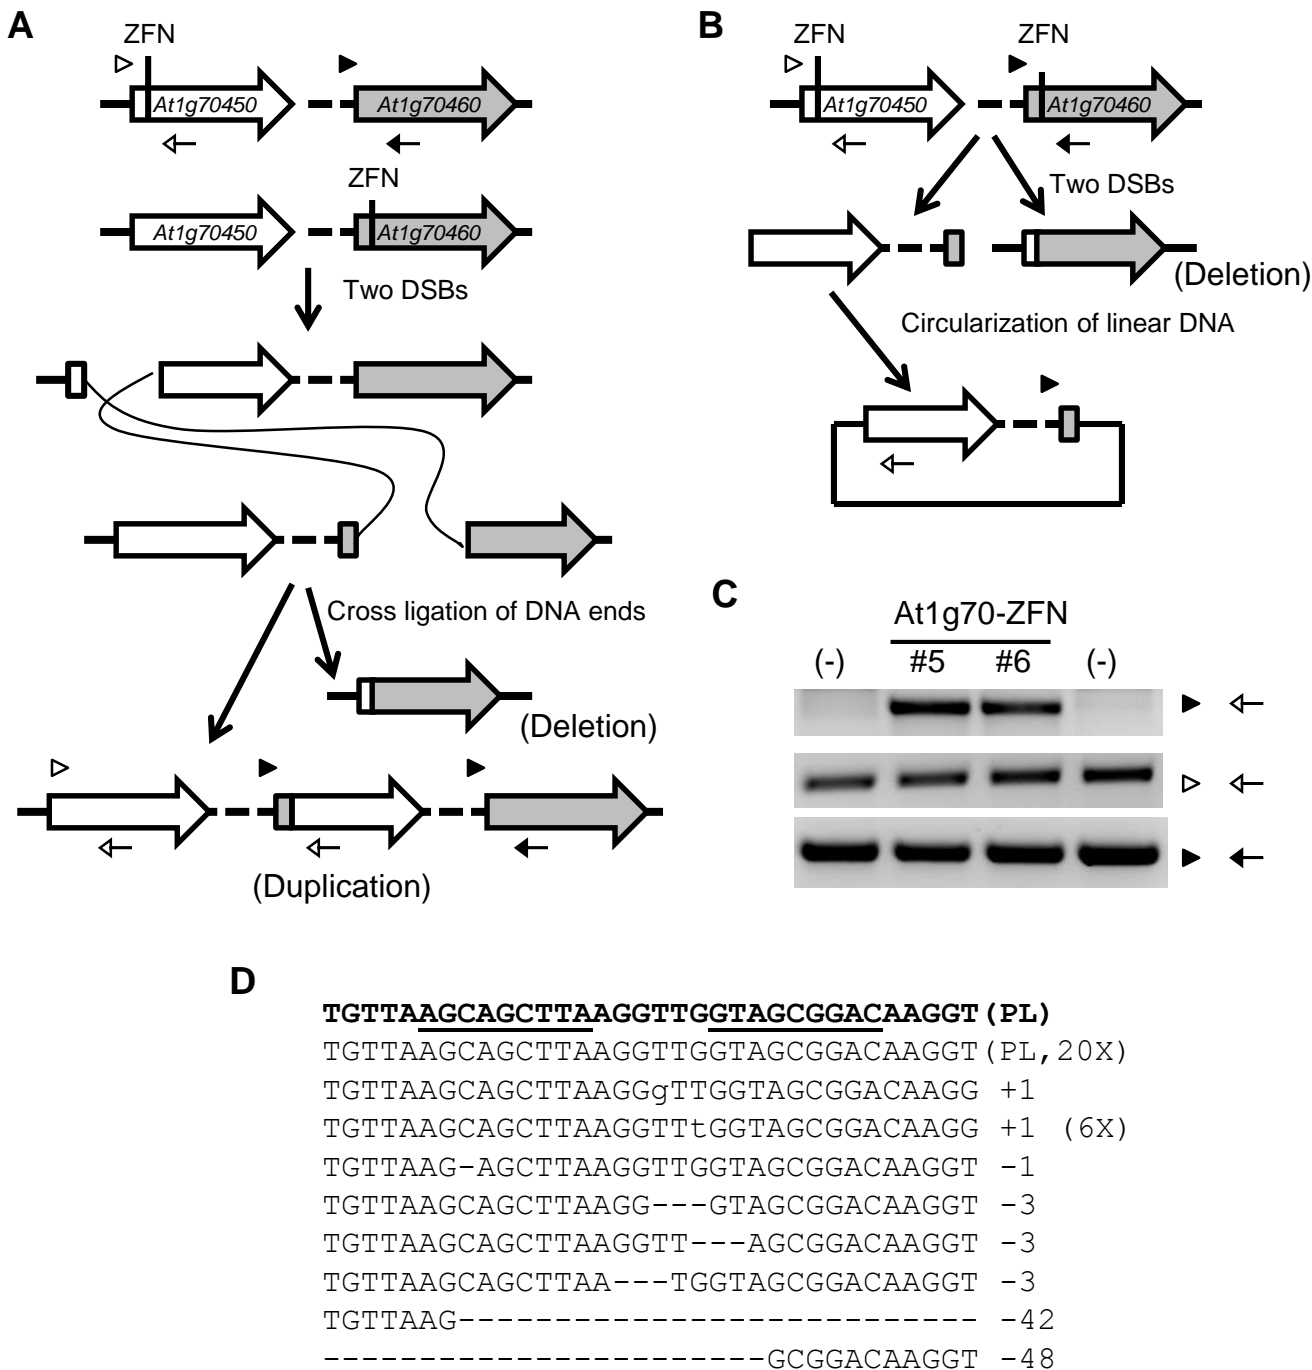

**Figure S9** Duplication of a gene cluster or circularization of deleted DNA at the *At1g70450-At1g70460* locus. (A) Schematic of the *At1g70450* gene cluster duplication. (B) Schematic of circularization of deleted DNA. (C) PCR confirmation of possible gene cluster duplications. (D) DNA sequence data from clones indicative of possible gene cluster duplications.

**Table S1 Zinc finger arrays, recognition sites and recognition helices.**

| Zinc finger arrays | Recognition sites and recognition helix amino acid sequences |         |         |
|--------------------|--------------------------------------------------------------|---------|---------|
|                    | F1                                                           | F2      | F3      |
| At1g53-ZF_left     | GAG                                                          | GCT     | GTG     |
|                    | KHSNLTR                                                      | QRSDLTR | RPDALPR |
| At1g53-ZF_right    | GTA                                                          | GCT     | TAA     |
|                    | QQSLLR                                                       | QRSDLTR | QRGNLNM |
| At1g70-ZF_left     | GCT                                                          | GCT     | TAA     |
|                    | MKNTLTR                                                      | QRSDLTR | QRGNLNM |
| At1g70-ZF_right    | GAC                                                          | GCG     | GTA     |
|                    | DPSNLIR                                                      | RTDTLAR | QGGALQR |
| At4g16-ZF_left     | GAA                                                          | GAA     | GAA     |
|                    | QASNLTR                                                      | QQTNLTR | QTNLNR  |
| At4g16-ZF_right    | GGA                                                          | GCC     | GTA     |
|                    | DNAHLAR                                                      | DSSVLR  | QSTSLQR |
| At3g21-ZF_left     | TGT                                                          | GCT     | GGT     |
|                    | KRQHLEY                                                      | QRSDLTR | HGHRKLT |
| At3g21-ZF_right    | GCT                                                          | GCC     | GAT     |
|                    | LRTSLVR                                                      | DSSVLR  | LSTNLTR |
| At5g01-ZF_left     | GGA                                                          | GGC     | GGA     |
|                    | RPSKLV                                                       | LKEHLTR | QSQHLVR |
| At5g01-ZF_right    | GAA                                                          | GAA     | GGC     |
|                    | QASNLTR                                                      | QQTNLTR | KNVSLTH |

**Table S2 Oligos for amplifying Arabidopsis DNA**

| Oligo name      | Oligo sequence            | Purpose                                                                             | Note                                                                                    |
|-----------------|---------------------------|-------------------------------------------------------------------------------------|-----------------------------------------------------------------------------------------|
| At1g53430-F2    | CTgtaagcaaaactaactaaccac  | For detection of mutations at At1g53430 site                                        |                                                                                         |
| At1g53430-R2    | ctcacGTTTAGCATCTTCTGGACA  | For detection of mutations at At1g53430 site and gene cluster inversions            | Designated as an open arrow in Fig. S5A and B                                           |
| At1g53440-F1    | tagatgatatttttaaccgtgac   | For detection of gene cluster inversions and large chromosomal deletions            | Designated as F2 in Fig. 4A and as a filled, tailless arrow in Fig. 5A and B            |
| At1g53440-F2    | tattcggatcatcaaggtca      | For detection of mutations at At1g53440 site                                        |                                                                                         |
| At1g53440-R2    | TTCTTAAGCACCATTTGGACActac | For detection of mutations at At1g53440 site                                        |                                                                                         |
| At1g53430-F1    | ATTGGTCCATGAGTGAGC        | For detection of gene cluster deletions, inversions and large chromosomal deletions | Designated as F1 in Fig. 3A and Fig. 4A, and as an open tailless arrow in Fig. 5A and B |
| At1g53440-R3    | aagggtctcttttttcaag       | For detection of gene cluster deletions and inversions                              | Designated as R2 in Fig. 3A and as a filled arrow in Fig. 5A and B                      |
| At1g70450-F3    | TTCTTCTCCAACAGCACCGTCAG   | For detection of mutations at At1g70450 site and gene cluster deletions             | Designated as F1 in Fig. 3B                                                             |
| At1g70450-R2    | CACTGGCCTACCTTCCctgtc     | For detection of mutations at At1g70450 site and gene cluster inversions            | Designated as an open arrow in Fig. S8A and B                                           |
| At1g70450-R3    | GGTGACctgcaaaacaagataaat  | For detection of gene cluster duplications                                          | Designated as an open arrow in Fig. S9                                                  |
| At1g70460-F     | TACTCTGGTCTGGTGGTTAC AAT  | For detection of gene cluster duplications                                          | Designated as a tailless filled arrow in Fig. S9                                        |
| At1g70460-F3    | GAGGAGGAGGTTATACACGG TCAG | For detection of mutations at At1g70460 site                                        |                                                                                         |
| At1g70460-R2    | AGTACTGGCCTTCCCTTCCctactc | For detection of mutations at At1g70460 site and gene cluster inversions            | Designated as an filled arrow in Fig. S8A and B                                         |
| At1g70460-R3    | tgcaaaacaaaacaaaacataca   | For detection of gene cluster deletions                                             | Designated as R2 in Fig. 3B                                                             |
| At4g16960-F     | gtctttaggtggtttgatgta     | For detection of NHEJ-mediated mutagenesis                                          |                                                                                         |
| At4g16960/940-R | CCATTTGATCCAAGTCTTTG      | For detection of mutations at At4g16960 and At4g16940 sites                         |                                                                                         |
| At4g16940-F     | agcaccacctcagccccatac     | For detection of mutations at At4g16960 site and gene cluster deletions             | Designated as F2 in Fig. 3C                                                             |
| At4g16860/950-F | tggagggaaggaagacgaagtt    | For detection of mutations at At4g16860 site                                        |                                                                                         |
| At4g16860-R     | ATTTGTTCCCTTTCTTGTA       | For detection of mutations at At4g16860 site and gene cluster deletions             |                                                                                         |
| At4g16960-F2    | tctgtatcatattagtttagttcg  | For detection of gene cluster deletions                                             | Designated as F1 in Fig. 3C                                                             |
| At4g16940-R2    | aaagagaataaacagatttattt   | For detection of gene cluster deletions                                             | Designated as R2 in Fig. 3C                                                             |
| ADH1F           | TCGAGGAAGTGAGGTTGCT       | For detection of mutations at the ADH1 site                                         |                                                                                         |
| ADH1R2          | TGGCTGAAGATCAGTCACTCC     | For detection of mutations at the ADH1 site and large chromosomal deletions         | Designated as R in Fig. 4A                                                              |
