# Supplementary material for: Targeted Deletion and Inversion of Tandemly Arrayed Genes in Arabidopsis thaliana Using Zinc Finger Nucleases
Source: PubMed Central journal article supplement (PMC3789795; doi:10.1534/g3.113.006270), 2013-10-01
Supplement: supp_g3.113.006270_FigureS1.pdf [file supp_g3.113.006270_FigureS1.pdf]

> At1g53-ZF\_Left  
GAAAAAAA**TCTAGA**CCCGGGGAGCGCCCTTCCAGTGTGCGATTTGCATGCGGAACTTTTCGAAACATTCTAACTTGACCCGTCATACCC  
GTACTCATACCGGTGAAAAACCGTTTCAGTGTGCGATCTGTATGCGAAATTTCTCCCAGCGTTCTGACTTGACCCGTCATCTACGTACGC  
ACACCGGCGAGAAGCCATTCCAATGCCGAATATGCATGCGCAACTTCAGTCGTCCAGACGCATTGCCACGTACCTAAAAACCCACCTG  
AGGG**GATCCA**AAGAAGGA

> At1g53-ZF\_right  
GAAAAAAA**TCTAGA**CCCGGGGAGCGCCCTTCCAGTGTGCGATTTGCATGCGGAACTTTTCGAGCAGTCTTCTTTGTTGCGTCATACCC  
GTACTCATACCGGTGAAAAACCGTTTCAGTGTGCGATCTGTATGCGAAATTTCTCCCAGCGTTCTGACTTGACCCGTCATCTACGTACGC  
ACACCGGCGAGAAGCCATTCCAATGCCGAATATGCATGCGCAACTTCAGTCAGCGTGGTAACTTGAACATGCACCTAAAAACCCACCTG  
AGGG**GATCCA**AAGAAGGA

> At1g70-ZF\_left  
GAAAAAAA**TCTAGA**CCCGGGGAGCGCCCTTCCAGTGTGCGATTTGCATGCGGAACTTTTCGATGAAAAACACCTTGACCCGTCATACC  
CGTACTCATACCGGTGAAAAACCGTTTCAGTGTGCGATCTGTATGCGAAATTTCTCCCAGCGTTCTGACTTGACCCGTCATCTACGTACGC  
CACACCGGCGAGAAGCCATTCCAATGCCGAATATGCATGCGCAACTTCAGTCAGCGTGGTAACTTGAACATGCACCTAAAAACCCACCT  
GAGG**GATCCA**AAGAAGGA

> At1g70-ZF\_right  
GAAAAAAA**TCTAGA**CCCGGGGAGCGCCCTTCCAGTGTGCGATTTGCATGCGGAACTTTTCGAGCCATCTAACTTGATTGTCATACCC  
GTACTCATACCGGTGAAAAACCGTTTCAGTGTGCGATCTGTATGCGAAATTTCTCCCAGTACCGACACCTTGGCAGTCATCTACGTACGC  
ACACCGGCGAGAAGCCATTCCAATGCCGAATATGCATGCGCAACTTCAGTCAGGGTGGTGCATTGCAGCGTCACCTAAAAACCCACCTG  
AGGG**GATCCA**AAGAAGGA

> At4g16-ZF\_left  
GAAAAAAA**TCTAGA**CCCGGGGAGCGCCCTTCCAGTGTGCGATTTGCATGCGGAACTTTTCGAGGCATCTAACTTGACCCGTCATACC  
CGTACTCATACCGGTGAAAAACCGTTTCAGTGTGCGATCTGTATGCGAAATTTCTCCCAGCAGACCAACTTGACCCGTCATCTACGTACGC  
CACACCGGCGAGAAGCCATTCCAATGCCGAATATGCATGCGCAACTTCAGTCAGACCAACAACCTTGAACCGTCACCTAAAAACCCACCT  
GAGG**GATCCA**AAGAAGGA

> At4g16-ZF\_right  
GAAAAAAA**TCTAGA**CCCGGGGAGCGCCCTTCCAGTGTGCGATTTGCATGCGGAACTTTTCGAGACAACGCACATTTGGCAGTCATACC  
CGTACTCATACCGGTGAAAAACCGTTTCAGTGTGCGATCTGTATGCGAAATTTCTCCGACTCTTCTGTTTTGCGTCGTCATCTACGTACGC  
ACACCGGCGAGAAGCCATTCCAATGCCGAATATGCATGCGCAACTTCAGTCAGTCTACCTTTTGCAGCGTCACCTAAAAACCCACCTGA  
GGG**GATCCA**AAGAAGGA

> At3g21-ZF\_left  
GAAAAAAA**TCTAGA**CCCGGGGAGCGCCCTTCCAGTGTGCGATTTGCATGCGGAACTTTTCGAAACGTCAGCATTTGGAATATCATACCC  
GTACTCATACCGGTGAAAAACCGTTTCAGTGTGCGATCTGTATGCGAAATTTCTCCCAGCGTTCTGACTTGACCCGTCATCTACGTACGC  
ACACCGGCGAGAAGCCATTCCAATGCCGAATATGCATGCGCAACTTCAGTCATGGTCATCGTTTGAACCCACCTAAAAACCCACCTGA  
GGG**GATCCA**AAGAAGGA

> At3g21-ZF\_right  
GAAAAAAA**TCTAGA**CCCGGGGAGCGCCCTTCCAGTGTGCGATTTGCATGCGGAACTTTTCGTTGCGTACCTCTTTGGTTGTCATACCC  
GTACTCATACCGGTGAAAAACCGTTTCAGTGTGCGATCTGTATGCGAAATTTCTCCGACTCTTCTGTTTTGCGTCGTCATCTACGTACGCA  
CACCGGCGAGAAGCCATTCCAATGCCGAATATGCATGCGCAACTTCAGTTTGTCTACCAACTTGACCCGTCACCTAAAAACCCACCTGAG  
GGG**GATCCA**AAGAAGGA

> At5g01-ZF\_left  
GAAAAAAA**TCTAGA**CCCGGGGAGCGCCCTTCCAGTGTGCGATTTGCATGCGGAACTTTTCGCGTCCATCTAAATTGGTTTTGCATACCC  
GTACTCATACCGGTGAAAAACCGTTTCAGTGTGCGATCTGTATGCGAAATTTCTCCTTGAAAGAACATTTGACCCGTCATCTACGTACGCA  
CACCGGCGAGAAGCCATTCCAATGCCGAATATGCATGCGCAACTTCAGTCAGTCTCAGCATTTGGTTGTCACCTAAAAACCCACCTGAG  
GGG**GATCCA**AAGAAGGA

> At5g01-ZF\_right  
GAAAAAAA**TCTAGA**CCCGGGGAGCGCCCTTCCAGTGTGCGATTTGCATGCGGAACTTTTCGAGGCATCTAACTTGACCCGTCATACC  
CGTACTCATACCGGTGAAAAACCGTTTCAGTGTGCGATCTGTATGCGAAATTTCTCCCAGCAGACCAACTTGACCCGTCATCTACGTACGC  
CACACCGGCGAGAAGCCATTCCAATGCCGAATATGCATGCGCAACTTCAGTAAAAACGTTTCTTTGACCCATCACCTAAAAACCCACCTG  
AGGG**GATCCA**AAGAAGGA

**Figure S1** DNA sequences for zinc finger arrays. DNA sequences for ten zinc finger arrays of five pairs of ZFNs are shown. The restriction enzyme sites (XbaI and BamHI) for subcloning of the zinc finger arrays into expression vectors are marked in red and blue, respectively.
