# Supplementary material for: Targeted Deletion and Inversion of Tandemly Arrayed Genes in Arabidopsis thaliana Using Zinc Finger Nucleases
Source: PubMed Central journal article supplement (PMC3789795; doi:10.1534/g3.113.006270), 2013-10-01
Supplement: supp_g3.113.006270_FigureS2.pdf [file supp_g3.113.006270_FigureS2.pdf]

**A**

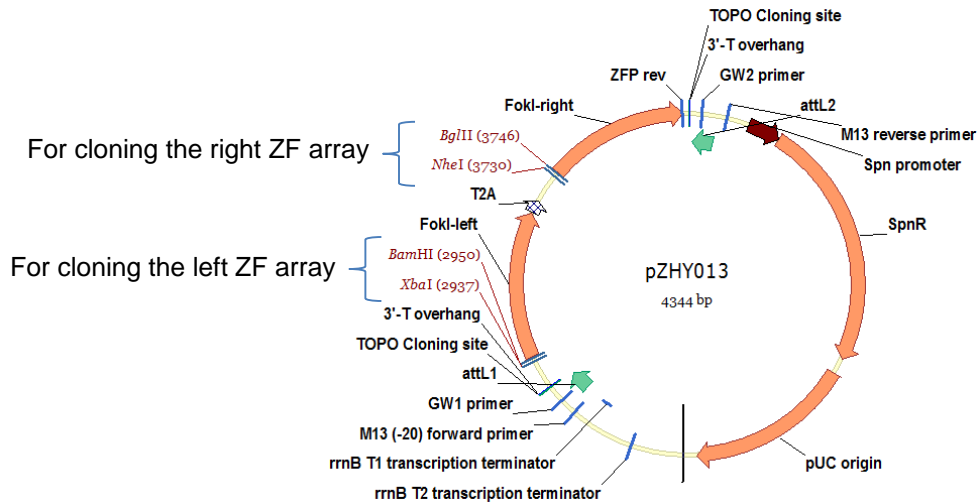

**B**

>pZHY013

```

aaggcgaaattcgaccgacttctgtacaaagtggcattataaaaaataattgctcatcaatttgggcaacgaacaggtcactatcagtaaaaaaatcaatttggccaatccagctga tatccctatagtgcgtattacatggtc
atagctgttccctggcagctctggcccggtctcaaaatctctgatgttacattgcacaagataaaaaatatacatcatgccccctctggaccagccagga cagaaaatgcctgactctgctctgccaaagggtgccgggtgacgcacaccg
tggaaacggatgaaggcagaaacccagtgacataaagcctgttcgggtctgaagctgtaagctcaagtagcctgctcagccaactggtccagaaaccttgaccgaacgagcggtgtaacgg cgacgtggcgggtttcatgctgt
ttatgactgtttttgggtacagctctatgcctcggccatcaaacgacgaacggcgttacgcgggttgcgtgattgatgtagtgtaggacagcaacgatgttacgcagacgggacagtcgcccta aaaaagaattaaacatcatgagggaaag
cggtgatcccgaagtatcgactcaactatcagaggtggtggcgtcatcgagcgccatctgaaaccgacgctgtgctggccgtacattttgactccgcagtggtatggcggcctgaagccaac acagtgatattgattgctggttacgggtg
accgtaaggcgtgatgaacaacgcggcgagcctttgatcaacgacctttggaaaactcggctccccctggagagagcgagattctccgcgctgtagaagtcaccattgttgccagcagacat callccgtggcgtttaccgtaaacgc
cgaaactgaattggagaatggcagcgcaatgacattcttcgaggtattctcgagcagccacgatcgacattgatctgctatctgtga caaaaagcaagagaacatagcgttgcctgtgtaggtccacggcggcgaggaactcttctgat
ccggttctgaaacagatctattgaggcgtctaaatgaaacctaaacgctatgaaactcgcgcgacgtggtgagcagaaatgtagtgcctgctccgacttggatcagcgcg ahtaaccgccaatcgccgaa
ggatgtcgtcgcagctgggcaatgagcgctcggcgccaatgacggcctatactgaagctagacaggtcattcttggacaagaagaagatcgctggcctcgcgcgagatcagttgg aagaatttgcactacgtgaaag
cggagatcaccaaggtagctggcaataaacctcgagcccacatgaccaaataccttaacgtgagttacgcgtgttccactgagctcagaccccgtagaagaagatcaaaaggatctctctga gatcctttttctgcgctaaatctgct
gcttgcacaaaaaaaaccaccgctaccagcggtgtgttttggcggtcaagagclacaaactcttttccgaaagttaactggtcctcagagcgcagatacaaaaatctgctctctagt tagccgtaaggccaccactcaag
aacctgtgaccaccctacatacctcgtctgtcaatcctgttaccagttgctcctcagtgccagtgccgataaactcgtcttaccgggttggactcaagacgatagttac ccggataggcgcagcgg gtcggcgtgaacgggggggtctgca
cacagcccacttgagcgaacgacctacacgaaactgagatacctcagcgtgacattgagaaaagcggcactcccgaaagggagaaaggcggacaggtatccggtaa cggcgagggctcggaacaggagagcgcagca
gggagctccaaggggaaacgcgtggtatcttatagtctctggtttcccaactctgactgagcgtgatatttggatgctcgcagggggggcgagcctatggaaaaaacgccacaa ccggccctttaccggttctggcctttgct
gcgctttgtccacatgttcttctcgtgatttccctgattctgtgataaccgltattaccgctttgagtgagctgacaccgctcgcggcagccgaacgcgagcgcagcagcgtcagcagcgcagcgcagcgcgcgccccac
caaacccgctctcccgcgcttgccgattcaatgacgtggcagcagcaggtttcccgactgaaagcggcgagtgagcgcacaaatatacgcgtaccgctccaggagaagatttg aaaaaagcccaaacgacatc
cgtcagagtgccctctctgattggtgctgagctggtccgcccacccctcggccgctgctcacaacgctcaaatccgctcccggcgatttctactacagga gagcgttccaccgacaaacaacagataaaa
acgaaaggccagctctccgactgagcctttctgttattgatgcctgcctactcctgcgttgaacgctgctgatgatttccagctcagcgtgtgaaaacagcggccagctt aagctcgggcccccaataatgattttattgac
tgatgtgacctgtctgtcaacaaattgatgagcaattgcttttataatggcaactgtgataaaaaagcaggtctcgaattcgccctcaccattgattataaggatcagatggcgacta caaggccaagatattgactacaagaag
gatgcgataaaatgctcctaagaaaaagcgaagctggtattccatggtgtccctctagataaacgcagagatcccagctggtgaaagtcggagctggaagaaaaaaaagagcagagctgcgccaca agctcaagatcgccccac
gagtcacatcgagctgatgagatgcccgcaaacacccaagacgcaactctggagatgaaagtgtgagttctctatgaaagtgtagcctacccggcaagcactggcggtcccgcaa gcccttggtggcctcatca
cctgtggctccccctcagactatggctcattgtcgacaccaaagcctaccggcgtctacaacttaccactcgtcagggcgcagagatcaacgctacgtgaaggagaaaccagaccgcaat aagccaactaataccaacgag
tgggtaaaggttaccctctctgtgaccgattcaaattcctgtgtctgcccactcaaggcaattataaggccaaactgcggcctgaaaccacaagaccaactgcacggccgctgctgtcctgtggagaaactgctgac
ggcggcagatgatcaaggctggtaccctgacctggaagaggtgctgcccgaagtcaacaatggtgaaatcaalltcaggctcggcggggagagggcagagaaagtctcaacatgctggtgacgtggaggagaatccccggcc
ctaggatggactacaagaccatgacgggtgattataaagatcatgacatcgattacaaggatgacagatgcccaccaagaagaagagggattggcattccacgggggtccggctagc tagiaagcttagatctcaact
agtcacaaaagtgaactggagagaagaatactgacactcgcataaattgaaatattgctcctgataatattgaaatgaaattgccagaaatccactcaggtatgaaattcgtgaaatga agttaaaggaaattttgaaagttatg
gataatagaagtaaacattgggtggtcaaggaaaaccggacgggcaattatactgctggactcctattgataacgtgtgactcgtgatacctaaagcttataacgtgaaatgataaactgccca attgcccaacgacagatgaaatggagccg
atatgtcgaagaaatacaaacgaaacaaacatcaaacctaatgaaatggtgaaagctctacactctgtaaacgaaatgaaattttattgtgagtggtcactttaaaggaaactaca aagctcagcttaccagttaaatcatatc
actaatgttaaggtgcttctagttagaagactttaaattgggtgggaaatgataaacggccacattaaacttagaagagtgagaccgaaatataaacggcgagataaaccttta atag

```

**Figure S2** ZFN expression entry clone-pZHY013. (A) Map of the pZHY013 entry clone. The restriction enzyme sites for cloning zinc finger arrays are marked. (B) Full sequence of the pZHY013 entry clone.
