# Supplementary material for: Targeted Deletion and Inversion of Tandemly Arrayed Genes in Arabidopsis thaliana Using Zinc Finger Nucleases
Source: PubMed Central journal article supplement (PMC3789795; doi:10.1534/g3.113.006270), 2013-10-01
Supplement: supp_g3.113.006270_FigureS4.pdf [file supp_g3.113.006270_FigureS4.pdf]

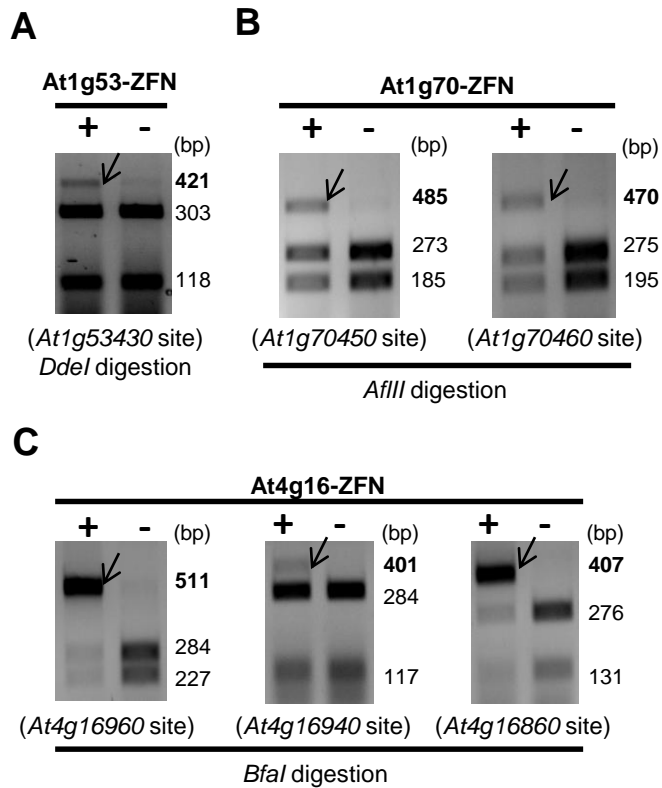

**Figure S4** CoDA-assembled ZFNs are active in T1 plants. (A) At1g53-ZFN's activity is detected at *At1g53430*. (B) At1g70-ZFN's activity is detected at both *At1g70450* and *At1g70460*. (C) At4g16-ZFN's activity is detected at *At4g16960*, *At4g16940* and *At4g16860*. Activity of ZFNs was measured by enrichment PCR using the restriction enzymes shown in each panel. The uncut bands represent ZFN-induced mutations and are indicated by arrows. Bulked estradiol-treated T1 transgenic plants or wild type plants were compared.
