# Supplementary material for: Targeted Deletion and Inversion of Tandemly Arrayed Genes in Arabidopsis thaliana Using Zinc Finger Nucleases
Source: PubMed Central journal article supplement (PMC3789795; doi:10.1534/g3.113.006270), 2013-10-01
Supplement: supp_g3.113.006270_FigureS5.pdf [file supp_g3.113.006270_FigureS5.pdf]

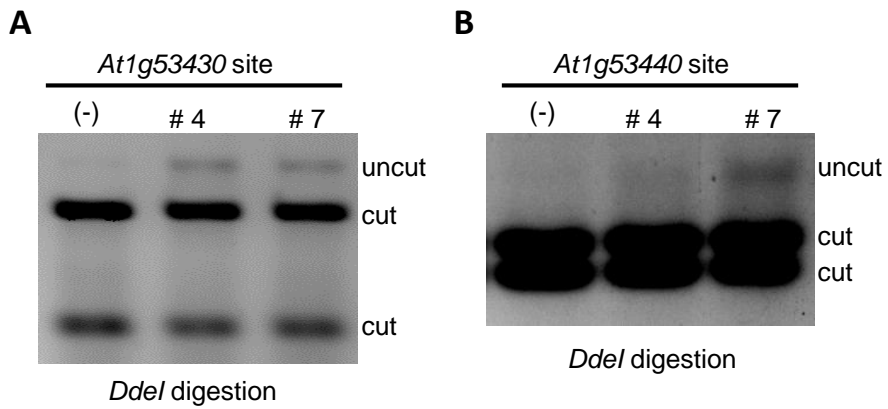

**Figure S5** *At1g53*-ZFN activity at two targets revealed by enrichment PCR in T2 plants. (A) Enrichment PCR detection of ZFN activity at the *At1g53430* locus in two T2 transgenic populations. (B) Enrichment PCR detection of ZFN activity at the *At1g53440* locus in two T2 transgenic plant populations.
