# Supplementary material for: Targeted Deletion and Inversion of Tandemly Arrayed Genes in Arabidopsis thaliana Using Zinc Finger Nucleases
Source: PubMed Central journal article supplement (PMC3789795; doi:10.1534/g3.113.006270), 2013-10-01
Supplement: supp_g3.113.006270_FigureS6.pdf [file supp_g3.113.006270_FigureS6.pdf]

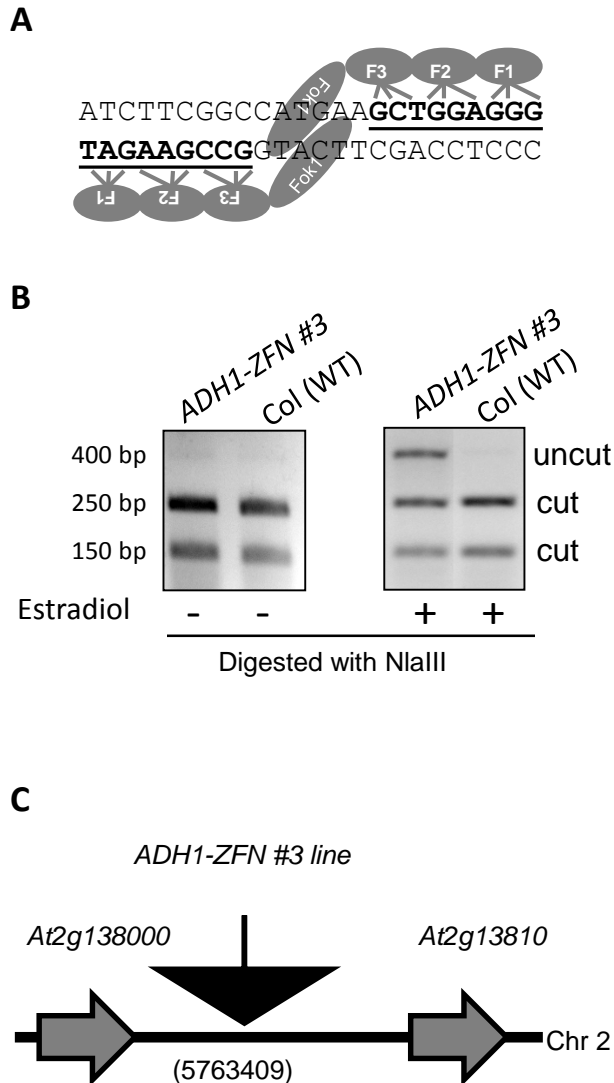

**Figure S6** An active ADH1-ZFN #3 line. (A) Schematic of the ADH1-ZFN and its target site. (B) ADH1-ZFN activity is highly estradiol-inducible. Mutagenesis activity, as reflected by the uncut band, was detected by PCR and digestion (C) Precise location of the transgene in *ADH1-ZFN* #3 line as mapped by TAIL-PCR.
