# Supplementary material for: Targeted Deletion and Inversion of Tandemly Arrayed Genes in Arabidopsis thaliana Using Zinc Finger Nucleases
Source: PubMed Central journal article supplement (PMC3789795; doi:10.1534/g3.113.006270), 2013-10-01
Supplement: supp_g3.113.006270_FigureS7.pdf [file supp_g3.113.006270_FigureS7.pdf]

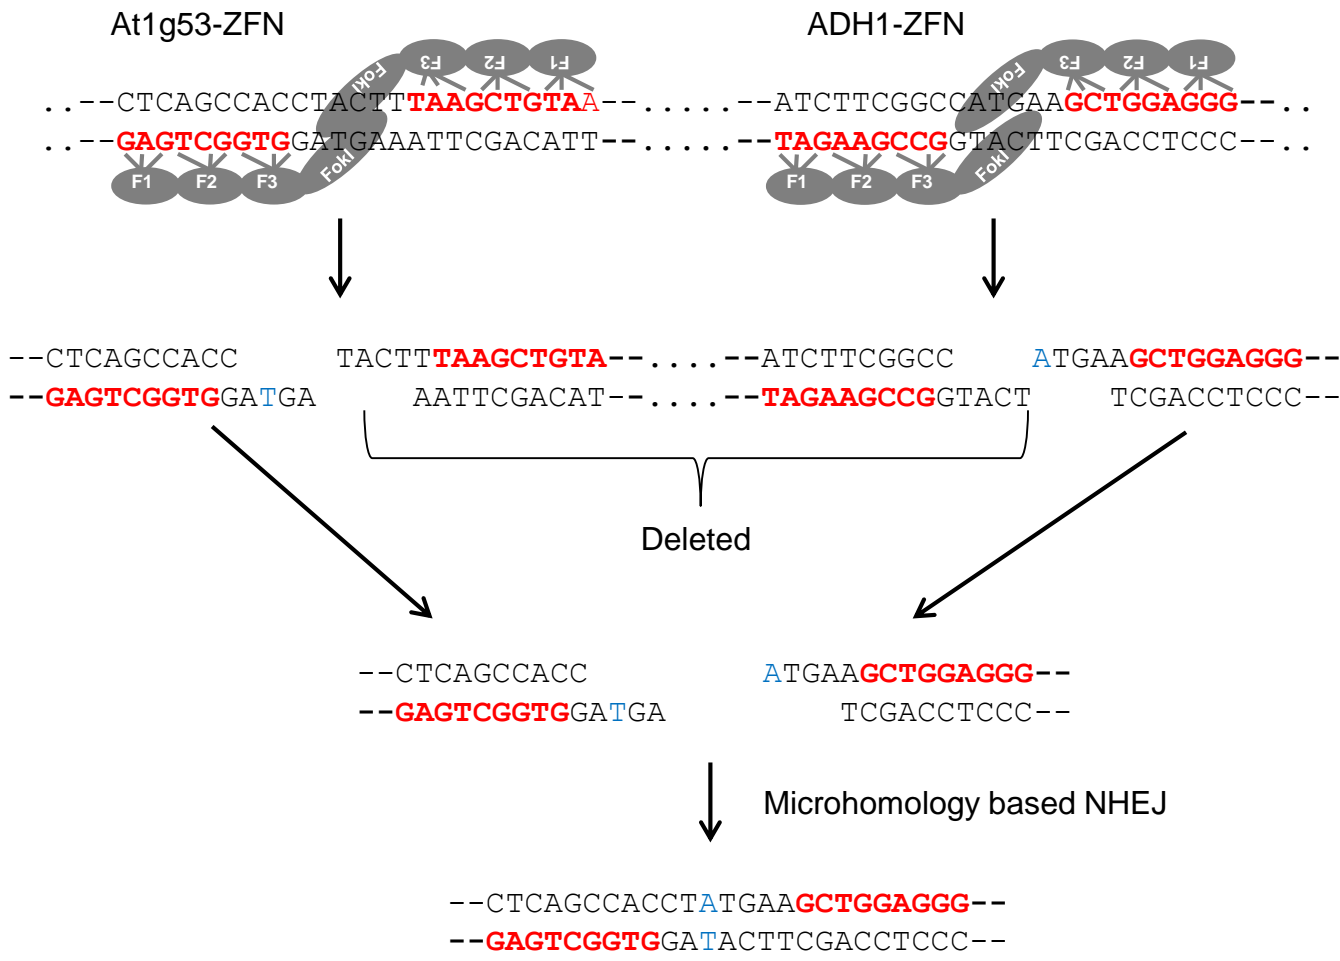

**Figure S7** A possible NHEJ repair mechanism using 1-bp of microhomology. The process that leads to a common ligation product is depicted. The ZFN binding sites are shown in red and the 1 nt of likely microhomology is marked in blue.
