# Supplementary material for: Targeted Deletion and Inversion of Tandemly Arrayed Genes in Arabidopsis thaliana Using Zinc Finger Nucleases
Source: PubMed Central journal article supplement (PMC3789795; doi:10.1534/g3.113.006270), 2013-10-01
Supplement: supp_g3.113.006270_FigureS9.pdf [file supp_g3.113.006270_FigureS9.pdf]

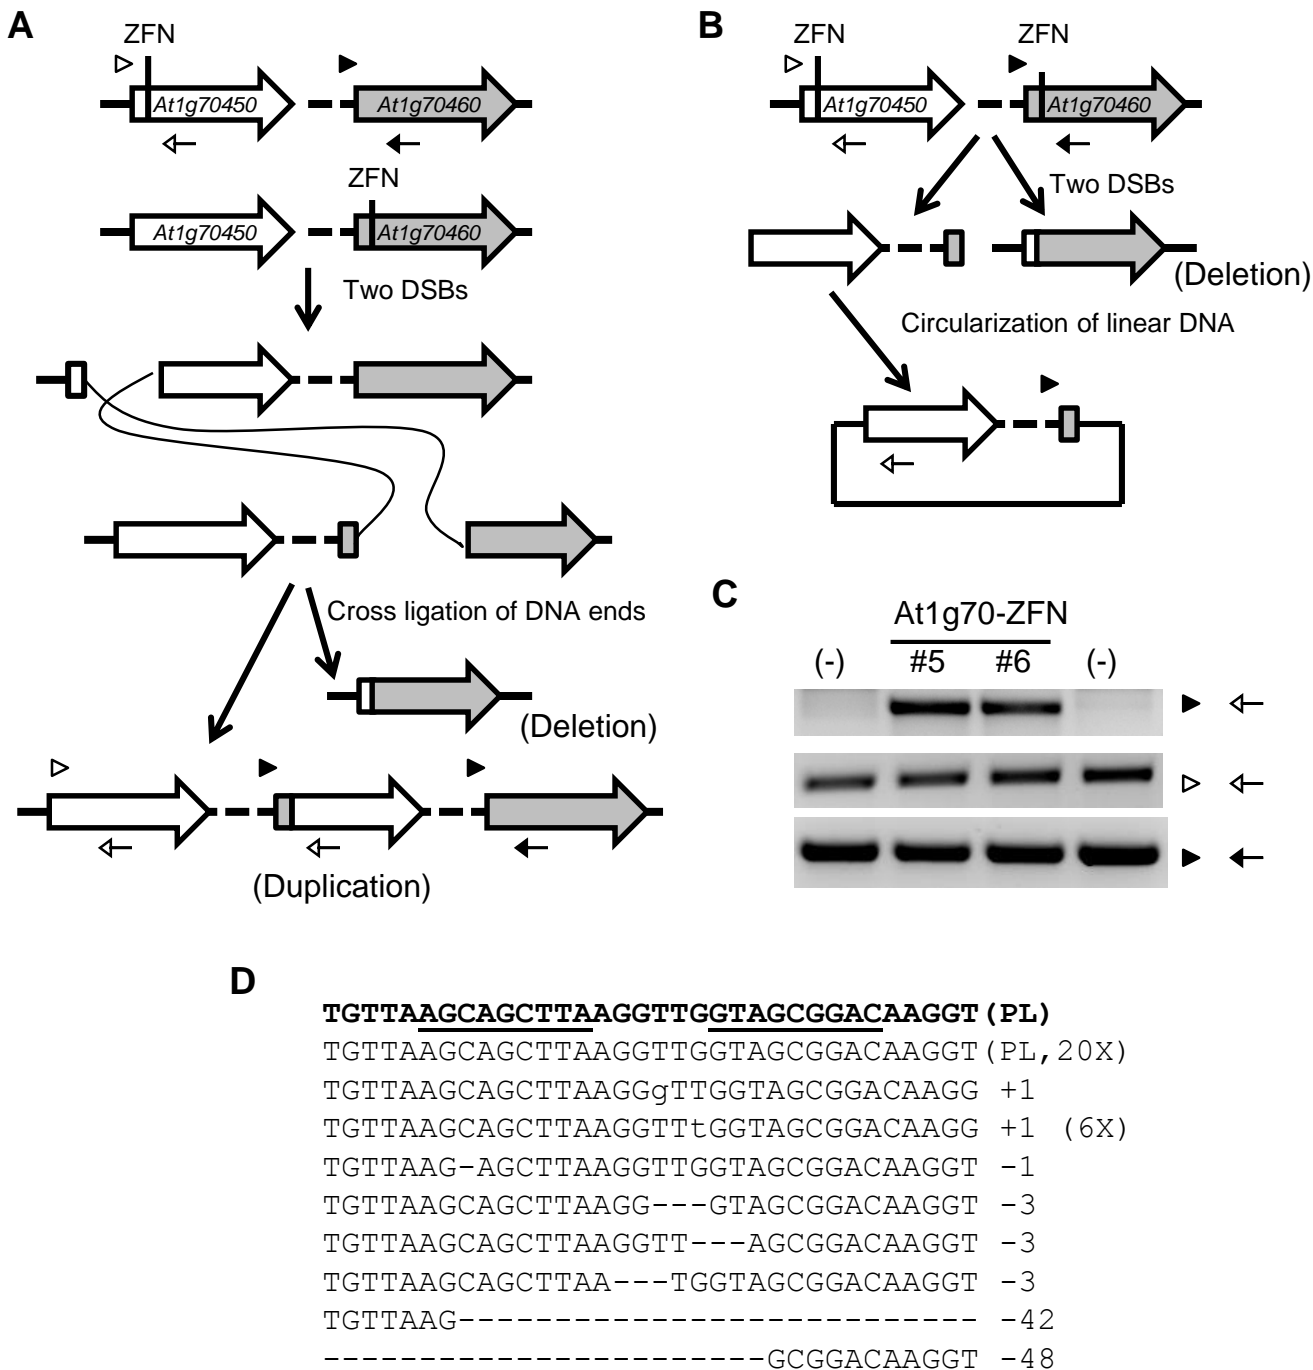

**Figure S9** Duplication of a gene cluster or circularization of deleted DNA at the *At1g70450*-*At1g70460* locus. (A) Schematic of the *At1g70450* gene cluster duplication. (B) Schematic of circularization of deleted DNA. (C) PCR confirmation of possible gene cluster duplications. (D) DNA sequence data from clones indicative of possible gene cluster duplications.
