# Supplementary material for: Targeted Deletion and Inversion of Tandemly Arrayed Genes in Arabidopsis thaliana Using Zinc Finger Nucleases
Source: PubMed Central journal article supplement (PMC3789795; doi:10.1534/g3.113.006270), 2013-10-01
Supplement: supp_g3.113.006270_TableS1.pdf [file supp_g3.113.006270_TableS1.pdf]

**Table S1 Zinc finger arrays, recognition sites and recognition helices.**

| Zinc finger arrays | Recognition sites and recognition helix amino acid sequences |         |         |
|--------------------|--------------------------------------------------------------|---------|---------|
|                    | F1                                                           | F2      | F3      |
| At1g53-ZF_left     | GAG                                                          | GCT     | GTG     |
|                    | KHSNLTR                                                      | QRSDLTR | RPDALPR |
| At1g53-ZF_right    | GTA                                                          | GCT     | TAA     |
|                    | QQSLLR                                                       | QRSDLTR | QRGNLNM |
| At1g70-ZF_left     | GCT                                                          | GCT     | TAA     |
|                    | MKNTLTR                                                      | QRSDLTR | QRGNLNM |
| At1g70-ZF_right    | GAC                                                          | GCG     | GTA     |
|                    | DPSNLIR                                                      | RTDTLAR | QGGALQR |
| At4g16-ZF_left     | GAA                                                          | GAA     | GAA     |
|                    | QASNLTR                                                      | QQTNLTR | QTNLNR  |
| At4g16-ZF_right    | GGA                                                          | GCC     | GTA     |
|                    | DNAHLAR                                                      | DSSVLR  | QSTSLQR |
| At3g21-ZF_left     | TGT                                                          | GCT     | GGT     |
|                    | KRQHLEY                                                      | QRSDLTR | HGHRKLT |
| At3g21-ZF_right    | GCT                                                          | GCC     | GAT     |
|                    | LRTSLVR                                                      | DSSVLR  | LSTNLTR |
| At5g01-ZF_left     | GGA                                                          | GGC     | GGA     |
|                    | RPSKLV                                                       | LKEHLTR | QSQHLVR |
| At5g01-ZF_right    | GAA                                                          | GAA     | GGC     |
|                    | QASNLTR                                                      | QQTNLTR | KNVSLTH |
