# Supplementary material for: Targeted Deletion and Inversion of Tandemly Arrayed Genes in Arabidopsis thaliana Using Zinc Finger Nucleases
Source: PubMed Central journal article supplement (PMC3789795; doi:10.1534/g3.113.006270), 2013-10-01
Supplement: supp_g3.113.006270_TableS2.pdf [file supp_g3.113.006270_TableS2.pdf]

**Table S2 Oligos for amplifying Arabidopsis DNA**

| Oligo name      | Oligo sequence            | Purpose                                                                             | Note                                                                                    |
|-----------------|---------------------------|-------------------------------------------------------------------------------------|-----------------------------------------------------------------------------------------|
| At1g53430-F2    | CTgtaagcaaaactaactaaccac  | For detection of mutations at At1g53430 site                                        |                                                                                         |
| At1g53430-R2    | ctcacGTTTAGCATCTTCTGGACA  | For detection of mutations at At1g53430 site and gene cluster inversions            | Designated as an open arrow in Fig. S5A and B                                           |
| At1g53440-F1    | tagatgatatttttaaccgtgac   | For detection of gene cluster inversions and large chromosomal deletions            | Designated as F2 in Fig. 4A and as a filled, tailless arrow in Fig. 5A and B            |
| At1g53440-F2    | tattcggatcatcaaggtca      | For detection of mutations at At1g53440 site                                        |                                                                                         |
| At1g53440-R2    | TTCTTAAGCACCATTTGGACActac | For detection of mutations at At1g53440 site                                        |                                                                                         |
| At1g53430-F1    | ATTGGTCCATGAGTGAGC        | For detection of gene cluster deletions, inversions and large chromosomal deletions | Designated as F1 in Fig. 3A and Fig. 4A, and as an open tailless arrow in Fig. 5A and B |
| At1g53440-R3    | aagggtctcttttttcaag       | For detection of gene cluster deletions and inversions                              | Designated as R2 in Fig. 3A and as a filled arrow in Fig. 5A and B                      |
| At1g70450-F3    | TTCTTCTCCAACAGCACCGTCAG   | For detection of mutations at At1g70450 site and gene cluster deletions             | Designated as F1 in Fig. 3B                                                             |
| At1g70450-R2    | CACTGGCCTACCTTCCctgtc     | For detection of mutations at At1g70450 site and gene cluster inversions            | Designated as an open arrow in Fig. S8A and B                                           |
| At1g70450-R3    | GGTGACctgcaaaacaagataaat  | For detection of gene cluster duplications                                          | Designated as an open arrow in Fig. S9                                                  |
| At1g70460-F     | TACTCTGGTCTGGTGGTTAC AAT  | For detection of gene cluster duplications                                          | Designated as a tailless filled arrow in Fig. S9                                        |
| At1g70460-F3    | GAGGAGGAGGTTATACACGG TCAG | For detection of mutations at At1g70460 site                                        |                                                                                         |
| At1g70460-R2    | AGTACTGGCCTTCCCTTCCctactc | For detection of mutations at At1g70460 site and gene cluster inversions            | Designated as an filled arrow in Fig. S8A and B                                         |
| At1g70460-R3    | tgcaaaacaaaacaaaacataca   | For detection of gene cluster deletions                                             | Designated as R2 in Fig. 3B                                                             |
| At4g16960-F     | gtctttaggtggtttgatgtta    | For detection of NHEJ-mediated mutagenesis                                          |                                                                                         |
| At4g16960/940-R | CCATTTGATCCAAGTCTTTG      | For detection of mutations at At4g16960 and At4g16940 sites                         |                                                                                         |
| At4g16940-F     | agcaccacctcagccccatac     | For detection of mutations at At4g16960 site and gene cluster deletions             | Designated as F2 in Fig. 3C                                                             |
| At4g16860/950-F | tggagggaaggaagacgaagtt    | For detection of mutations at At4g16860 site                                        |                                                                                         |
| At4g16860-R     | ATTTGTTCCCTTTCTTGTA       | For detection of mutations at At4g16860 site and gene cluster deletions             |                                                                                         |
| At4g16960-F2    | tctgtatcatattagtttagttcg  | For detection of gene cluster deletions                                             | Designated as F1 in Fig. 3C                                                             |
| At4g16940-R2    | aaagagaataacacagatttattt  | For detection of gene cluster deletions                                             | Designated as R2 in Fig. 3C                                                             |
| ADH1F           | TCGAGGAAGTGAGGTTGCT       | For detection of mutations at the ADH1 site                                         |                                                                                         |
| ADH1R2          | TGGCTGAAGATCAGTCACTCC     | For detection of mutations at the ADH1 site and large chromosomal deletions         | Designated as R in Fig. 4A                                                              |
